1 Title: Kinetics of *Plasmodium* midgut invasion in *Anopheles*  
2 mosquitoes

3

4 **Short Title: Live imaging of *Plasmodium* invasion of mosquito midguts**

5

6 Gloria Volohonsky<sup>1\*</sup>, Perrine Paul-Gilloteaux<sup>2,4</sup>, Jitka Štáfková<sup>1,5</sup>, Julien  
7 Soichot<sup>1,6</sup>, Jean Salamero<sup>2</sup>, Elena A. Levashina<sup>1,3\*</sup>

8

9 \*Corresponding authors:

10 Email: [gloria.volochonsky@isunet.edu](mailto:gloria.volochonsky@isunet.edu), [levashina@mpiib-berlin.mpg.de](mailto:levashina@mpiib-berlin.mpg.de)

11

12 **Affiliations:**

13 <sup>1</sup>INSERM U963, CNRS UPR9022, University of Strasbourg, France

14 <sup>2</sup>SERPICO Inria Team/UMR 144 CNRS & National Biology and Health  
15 Infrastructure "France Bioimaging", Institut Curie, Paris, France

16 UMR144 CNRS/Institut Curie, Plateforme Imagerie Cellulaire et Tissulaire-  
17 Infrastructure en Biologie Santé et Agronomie, Paris, France

18 <sup>3</sup>Vector Biology Unit, Max Planck Institute for Infection Biology, Berlin,  
19 Germany.

20 <sup>4</sup>Current address: Structure fédérative de recherche santé François-Bonamy,  
21 institut de recherche en santé de l'université de Nantes, Nantes, France.

22 <sup>5</sup>Current address: Department of Parasitology, Charles University, BIOCEV,  
23 Vestec, Czech Republic

24 <sup>6</sup>Current address: Institute for Parasitology, Zurich University, Zurich,  
25 Switzerland.

## 26 Abstract

27 Malaria-causing *Plasmodium* parasites traverse the mosquito midgut cells to  
28 establish infection at the basal side of the midgut. This dynamic process is a  
29 determinant of mosquito vector competence, yet the kinetics of the parasite  
30 migration is not well understood. Here we used transgenic mosquitoes of two  
31 *Anopheles* species and a *Plasmodium berghei* fluorescence reporter line to  
32 track parasite passage through the mosquito tissues at high spatial resolution.  
33 We provide new quantitative insight into malaria parasite invasion in African  
34 and Indian *Anopheles* species and demonstrate that species-specific kinetics  
35 of *Plasmodium* invasion is shaped by the mosquito complement-like system.

36

## 37 Author Summary

38 The traversal of the mosquito midgut cells is one of the critical stages in the life  
39 cycle of malaria parasites. Motile parasite forms, called ookinetes, traverse the  
40 midgut epithelium in a dynamic process which is not fully understood.

41 Here, we harnessed transgenic reporters to track invasion of *Plasmodium*  
42 parasites in African and Indian mosquito species. We found important  
43 differences in parasite dynamics between the two anopheline species and  
44 demonstrated an unexpected role of mosquito complement-like system in  
45 regulation of parasite invasion.

46

## 47 Introduction

48 Malaria is a vector-borne human infectious disease caused by protozoan  
49 parasites of *Plasmodium* species. It is widespread in tropical and subtropical  
50 regions, including parts of the Americas, Asia, and Africa. Approximately 200  
51 million annual cases of malaria result in half a million deaths [1]. Malaria-  
52 causing *Plasmodium* parasites are transmitted by *Anopheline* mosquitoes.  
53 Among more than 400 of known *Anopheles* species, only 40 are vectors of  
54 human malaria [2].

55 *Plasmodium* development in the mosquito begins with the ingestion of red  
56 blood cells infected with sexual-stage gametocytes. In the mosquito midgut,  
57 gametocytes differentiate into gametes that egress from the red blood cells and  
58 fuse to form the zygotes that develop into motile ookinetes within 16-18 h. The  
59 ookinetes penetrate the midgut epithelium 18 – 26 h after the infectious blood  
60 meal and transform into vegetative oocysts on the basal side of the midgut [3].  
61 After 12–14 days, mature oocysts rupture and release thousands of sporozoites  
62 into the mosquito hemocoel. Released sporozoites invade the salivary glands,  
63 where they reside inside the salivary ducts to be injected into a new host when  
64 the infected mosquito feeds again [4].

65 The passage of the malaria parasite through the mosquito vector is  
66 characterized by a major population bottleneck. Previous studies revealed that  
67 mosquitoes kill the majority of invading *Plasmodium* parasites (reviewed by  
68 [5,6]), predominantly during the ookinete stage at the basal side of the  
69 epithelium [7].

70 The immune response of mosquitoes to *Plasmodium* parasites is multifaceted  
71 and involves multiple processes. In the midgut, reactive oxygen and nitrogen

72 species, hemoglobin degradation products, as well as digestive enzymes and  
73 bacterial flora, all affect the rate of *Plasmodium* development (Reviewed in [8]).  
74 As parasites traverse midgut epithelial cells, the invaded cells produce high  
75 levels of nitric oxide synthase and peroxidases, creating a toxic environment  
76 for the parasites. As a result, some parasites undergo nitration which marks  
77 them for killing by the mosquito complement-like system [9]. Furthermore,  
78 intracellular parasites can trigger apoptosis causing extrusion and clearance of  
79 invaded cells from the cellular layer into the midgut lumen [10]. As *Plasmodium*  
80 tries to evade reactive oxygen and nitrogen species inside the cells, these toxic  
81 molecules may shape the path taken by the parasite through the cellular layer.  
82 When the surviving parasites finally reach the basal lamina, they encounter  
83 soluble immune factors that circulate in the hemolymph. Complement-like  
84 proteins TEP1 and leucine-rich repeat proteins APL1 and LRIM1 form a  
85 complex that mediates parasite killing [11,12]. Histological studies have shown  
86 that parasites crossing the cellular layer can be found both inside and in  
87 between midgut cells [3,13]. However, it is not yet known whether some  
88 parasites cross the cellular layer exclusively between cells, thus avoiding  
89 nitration and subsequent recognition by TEP1.  
90 Despite accumulating evidence of molecular processes that govern the  
91 passage of motile ookinetes through mosquito tissues, the complexity and  
92 diversity of this dynamic process remains to be deciphered. Three modes of  
93 motility were reported for the invading ookinetes, namely spiraling, gliding and  
94 stationary rotation [14][15]. Spiraling and gliding movements result in active  
95 displacement of the parasite in space. In contrast, stationary rotation movement  
96 was observed for prolonged periods of time and resulted in no displacement of

97 the ookinete. Because of the lack of markers of the entire midgut cellular layer,  
98 previous studies did not establish how distinct types of movements correlate  
99 with ookinete location in the midgut.

100 It has been previously demonstrated that *Anopheles* species differ in their  
101 vector competence [16]. In the laboratory, *Anopheles stephensi* (As) and  
102 *Anopheles gambiae* (Ag) can be infected with the murine parasite *Plasmodium*  
103 *berghei*, albeit at different rates [17]. We set out to image *in vivo* migration of  
104 the RFP-expressing *P. berghei* (Pb) ookinetes through the epithelial cells in  
105 these two genetically-modified mosquito species that express GFP in the  
106 midgut cells. Using high-speed spinning disk microscopy and automated image  
107 analyses, we quantified parasite invasion dynamics at high spatial and temporal  
108 resolution. Our data revealed unexpected differences in invasion of closely-  
109 related mosquito species, pointing to important species-specific mechanisms  
110 that regulate mosquito – parasite interactions. Moreover, silencing of the major  
111 component of the mosquito complement-like system affected the parasite  
112 invasion dynamics, suggesting a new function of TEP1 at the early stages of  
113 the midgut invasion process.

## 114 Results and discussion

### 115 **TEP1 inhibits midgut invasion of *P. berghei* ookinetes.**

116 To study the passage of *Pb* ookinetes through the mosquito midgut, we  
117 combined multiscale imaging techniques with high-throughput data analysis  
118 and mining (Fig 1). We used transgenic mosquitoes expressing GFP under  
119 midgut-specific promoters [18,19] to label mosquito midgut cells, and  
120 transgenic rodent *Pb* parasites expressing RFP under a constitutive promoter

121 [20] (S1a Fig). We first made sure that expression of the reporters did not  
122 interfere with *Plasmodium* infection. As expected, a significant difference was  
123 observed in infection intensity between *As* and *Ag*. Regardless of the infection  
124 levels, *As* developed significantly higher oocysts numbers than *Ag* (S1b Fig).  
125 We concluded that the transgenic mosquito and *Pb* lines can be used for *in vivo*  
126 imaging.

127

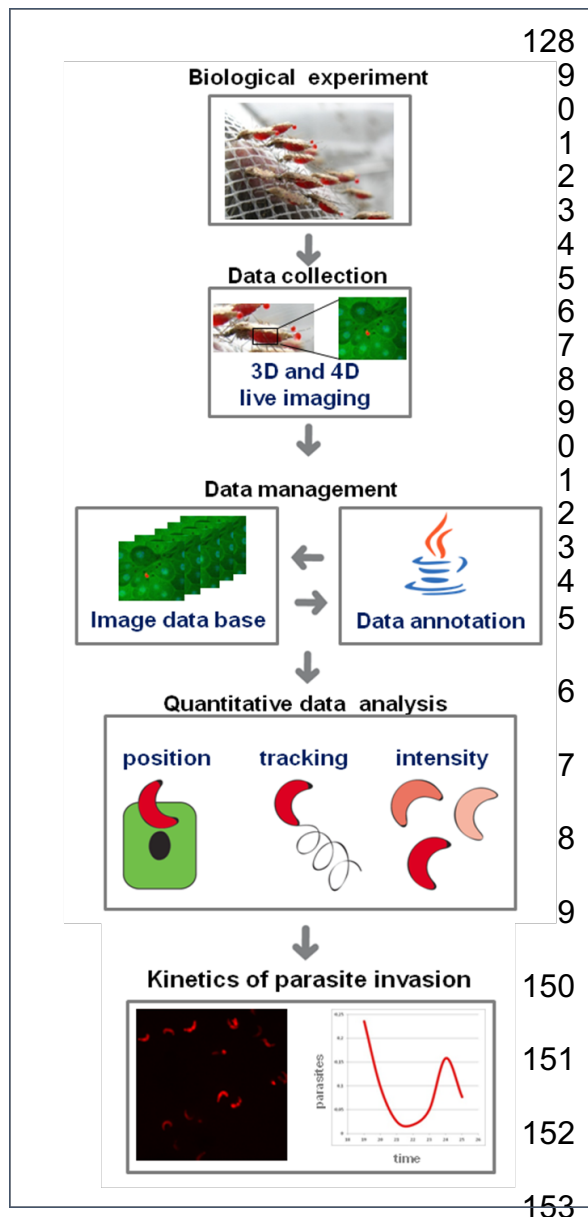

**Figure 1. Workflow and experimental settings.** *A. stephensi* (*As*) and *A. gambiae* (*Ag*) mosquitoes were blood fed on *P. berghei* infected mice, their midguts dissected and visualized using fast confocal microscopy. Images from all experiments collected at different time points after infection were uploaded into an image database and annotated. Quantitative data was extracted from the images in the database regarding the number, position and intensity of visualized parasites. The results of the data analysis reveal the kinetics of parasite invasion.

154 As the transgenic mosquito lines expressed GFP in the entire midgut cell, we  
155 measured the exact position of RFP-expressing parasites relative to the cellular

156 layer (Fig 2). To this end, we collected large series of z-stack images of live  
 157 parasites inside the dissected mosquito midguts at different time points after  
 158 infection and time-lapse images of selected parasites. These tools enabled us  
 159 to study the parasite invasion process at two time-scales: one was based on  
 160 statistical analysis of parasites in three dimensional (3D) snapshots of the state  
 161 of infection between 18 and 25 h post infection, the second tracked single  
 162 parasites 18 to 25 h post infection over a time of 20 min to 2 h.  
 163

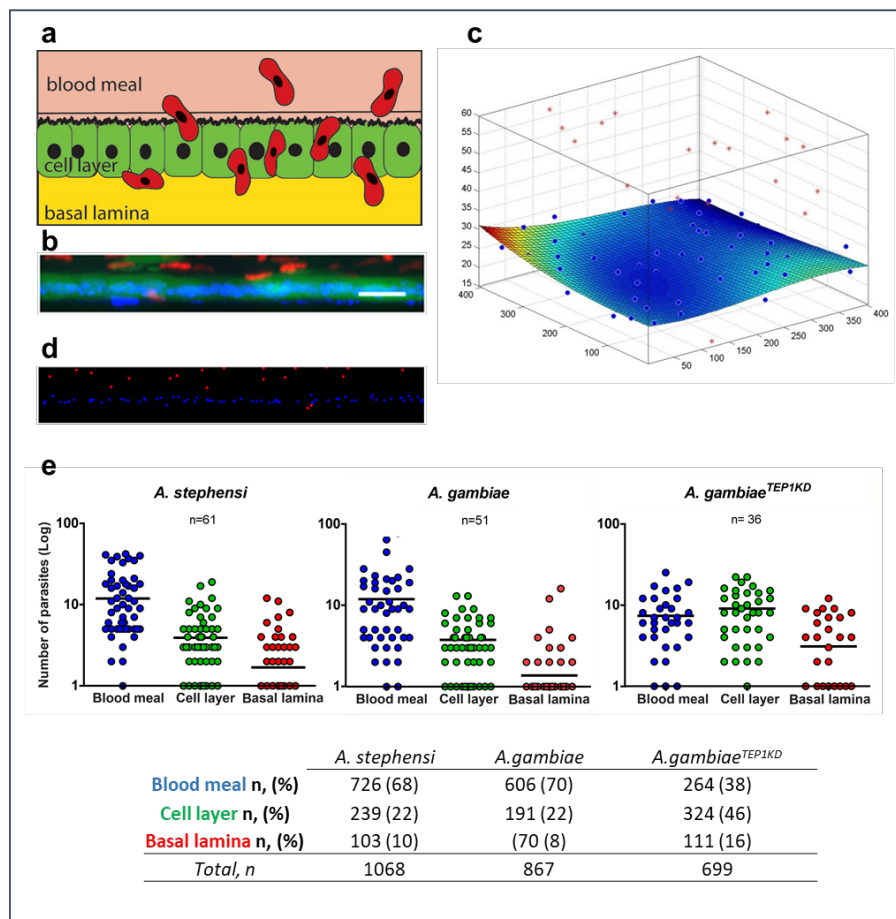

164

165

166 **Figure 2. Positions of the parasites relative to the midgut cells.** a. Schematic  
 167 representation of topology in the mosquito midgut. Motile ookinetes (red) traverse the  
 168 mosquito midgut cells and establish infection on the basal side under the basal lamina.  
 169 b. A representative projection of a cross section of *A. stephensi* midgut, scale bar - 50  
 170  $\mu$ m. GFP-positive midgut cells are in green, RFP-positive *P. berghei* parasites are in  
 171 red, nuclei are labeled by DAPI in blue. c. Schematic 3D representation of the same  
 172 midgut as in (b), where the position of the cellular layer is calculated relative to the



173 nuclei. Positions of parasites are indicated as red dots, nuclei as blue dots. Deviation  
174 of the cell layer from a flat surface is color-coded from blue to red (blue no deviation,  
175 red - 10  $\mu\text{m}$ ). Note the blood meal location of the majority of parasites (above the cell  
176 layer). **d.** Representation of nuclei (blue) and parasites (red) in the same midgut as **(b)**  
177 after segmentation. **e.** Pooled positions of the parasites from all records at all time  
178 points are shown for three layers relative to the midgut cells (blood meal, cellular layer  
179 or basal lamina) for *A. stephensi*, *A. gambiae* and *A. gambiae* mosquitoes silenced for  
180 *TEP1* (*A. gambiae*<sup>*TEP1KD*</sup>). Each dot represents the number of parasites at a given  
181 position in a single midgut. The numbers of midguts analyzed (n) are indicated above  
182 the graph. Horizontal lines depict the mean number of parasites per position. The table  
183 below summarizes parasite distribution inside the mosquito midguts at 18-25 hpi. The  
184 percentage of ookinetes in the midguts of *A. stephensi*, *A. gambiae* and *Ag*<sup>*TEP1KD*</sup> at  
185 each location (blood meal, cellular layer and basal lamina) is given in parenthesis. n is  
186 the number of parasites at each position, total n is the total number of analyzed  
187 parasites.

188

189 For each record, parasites and nuclei of the midgut cells were segmented and  
190 their positions in 3D space were calculated relative to the cellular layer at each  
191 examined time point after infection (Fig 2). The position of parasites relative to  
192 the cellular layer was determined by fitting the midgut cell nuclei position by a  
193 cubic spline surface. This surface was then considered as the central position  
194 of the cellular layer (normalized z=0). An average thickness of 5  $\mu\text{m}$  above and  
195 below this surface defined the average cellular layer position.

196 We next examined whether the dynamics of parasite invasion was similar in  
197 two *Anopheles* species. To this end, we measured the number of parasites at  
198 each position (blood meal, cellular layer and basal lamina) in *As* and *Ag*.  
199 Analyses of all time points did not detect significant differences in parasite  
200 localization between the two species (Fig 2e). The majority of ookinetes were  
201 detected in the blood meal (70%) and in the cellular level (20%). Only few  
202 ookinetes crossed the midgut and reached the basal side (10%). Interestingly,  
203 silencing of the major antiparasitic factor *TEP1* in *Ag* (*AgTEP1KD*) significantly  
204 changed spatial distribution of the parasites with only 40% of ookinetes  
205 observed in the blood meal, 45% in the cellular layer and 15% at the basal side.



206 This difference in the dynamics of *Pb* invasion in *TEP1*-depleted mosquitoes  
207 was suggestive of an additional role of *TEP1* in inhibition of ookinete midgut  
208 invasion. Previous studies reported *TEP1* expression in the larval gastric ceaca  
209 and adult midguts [21,22]. In line with these reports, silencing of *TEP1* also  
210 affected midgut microbiota by an as yet unknown mechanism [23]. Our findings  
211 extend these observations to the early stages of parasite invasion and suggest  
212 that in addition to parasite killing at the basal side, *TEP1* directly or indirectly  
213 inhibits *Plasmodium* midgut traversal.

214

### 215 **Dynamics of the ookinete midgut invasion**

216 We next focused on *P. berghei* ookinete passage through the mosquito midgut  
217 cells at different time points after infection and examined the proportion of  
218 parasites at each position (blood meal, cellular layer and basal lamina). To this  
219 end, we calculated the average proportion of parasites at each position at the  
220 early (18 – 20 h post infection, hpi), intermediate (21 -23 hpi) and late (24 – 25  
221 hpi) intervals after infection (Fig 3a, S4Fig).

222 We observed that in *As* mosquitoes the proportion of blood bolus-residing  
223 parasites did not change over time. The proportion of parasites within the  
224 cellular layer significantly increased between the early (14% at 18-20 hpi) and  
225 intermediate (32% at 21-23 hpi) time intervals. However, this increase did not  
226 cause accumulation of the ookinetes at the basal lamina. Instead, a significant  
227 decrease in the proportion of basally located parasites was detected between  
228 the early (20% at 18-20 hpi) and intermediate (4% at 21-23 hpi) time intervals.  
229 Strikingly, this decrease was temporal, as the proportion of parasites in the  
230 basal lamina significantly increased at the late time interval (10% at 24-25 hpi).

231 Similar decrease in the proportion of basally located ookinetes was detected in  
 232 *Ag*, where the proportion of parasites at the basal lamina declined from 12% at  
 233 18-20 hpi to 3% at 21-23 hpi, and then increased again to 14% at the late time  
 234 interval.

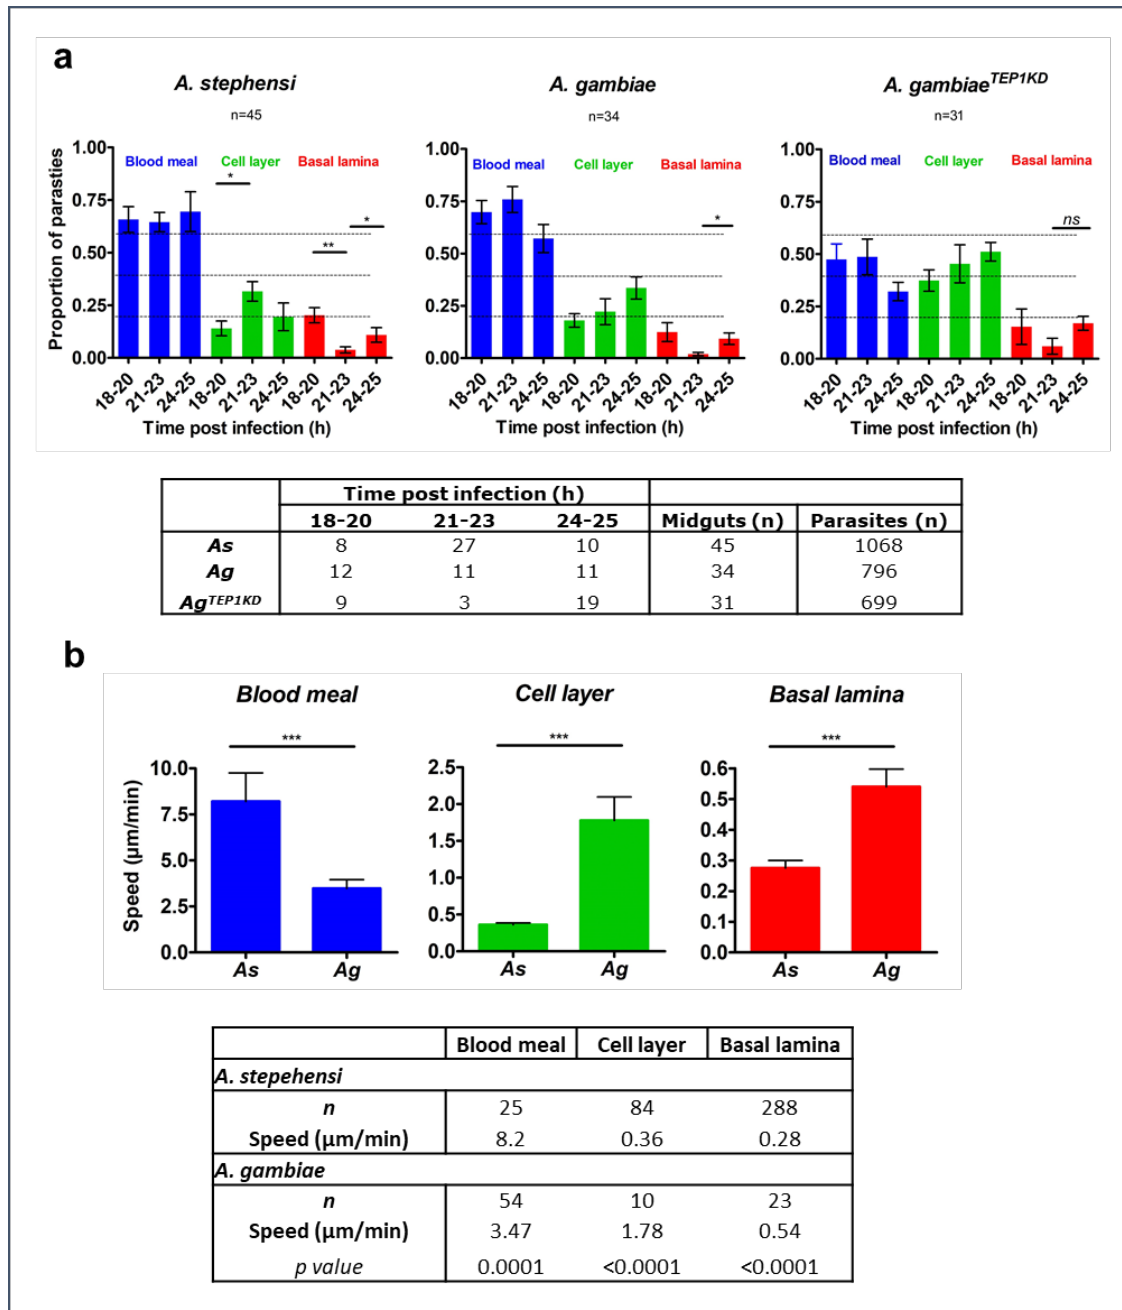

235

236 **Figure 3. Kinetics of *P. berghei* invasion of *A. stephensi* and *A. gambiae* midguts.**  
 237 **a.** Positions of parasites in *A. stephensi* (*As*), *A. gambiae* (*Ag*) and in *A. gambiae*  
 238 mosquitoes silenced for *TEP1* (*A. gambiae<sup>TEP1KD</sup>*) between 18 and 25 h post infection  
 239 (hpi). Plots show the proportion of parasites at each position (blood meal, cellular layer

240 and basal lamina) for three different time intervals (18-20, 21-23 and 24-25 hpi). Each  
241 bar represents the average proportion of parasites in midguts with at least 10  
242 parasites. Parasite positions were calculated by the distance from the cellular layer:  
243 blood meal for ookinetes detected more than 5  $\mu\text{m}$  above the cellular layer; basal  
244 lamina for parasites observed more than 5  $\mu\text{m}$  below the cellular layer. Statistical  
245 analyses were performed by a non-parametric Mann-Whitney test. The table below  
246 shows the number of midguts analyzed at each time interval for each mosquito type.  
247 **b.** Speed of parasites as function of the parasite position in *As* and *Ag*. Speed ( $\mu\text{m}/\text{min}$ )  
248 was determined by tracking the parasites position over time from the time-lapse series.  
249 Four time-lapse experiments were used: guid 1615 and guid 1628 for *As* and guid  
250 1622 and guid 2109 for *Ag*. The table below details the number of frames (*n*) used for  
251 speed calculations. Statistical significance of differences in the average speed at each  
252 given position between *As* and *Ag* were examined by the non-parametric Mann-  
253 Whitney test and  $p \leq 0.0001$  are shown by three asterisks.

254  
255

256 Since the mosquito immune system targets the ookinetes at the basal side of  
257 the midgut [24], we examined whether the observed decrease in the proportion  
258 of basally located ookinetes was rescued by *TEP1* knockdown. *TEP1* silencing  
259 eliminated the decrease in the basally located ookinetes observed in *As* and  
260 *Ag* mosquitoes and at the same time increased the proportion of parasites  
261 within the cellular layer (Fig 3a). These results suggest that the first wave of  
262 invading ookinetes is rapidly killed and lysed by the mosquito immune system.  
263 As the parasites that reach the basal lamina at later time points do accumulate,  
264 it is possible that asynchronous midgut invasion by *Pb* exhausts the  
265 components of the mosquito immune system and, thereby, benefits the  
266 establishment of infection by the second wave of the parasites. These results  
267 may also explain why not all parasites are recognized and killed by *TEP1* at the  
268 basal lamina. We suggest that early crossing parasites may serve as pioneers  
269 that attract and locally deplete *TEP1*, allowing later-coming parasites to survive  
270 the immune attack.

271 To better understand *Pb* invasion dynamics, we measured ookinete motility in  
272 time-lapse experiments. The blood-filled midguts were dissected from infected  
273 mosquitoes and mounted *ex vivo* for imaging by spinning disk microscopy for

274 20 to 120 min. In line with the previous work [14], we observed four distinct  
275 ookinete motility modes: (i) passive floating within the blood bolus (guid 2107,  
276 guid 1615, S1 Table), (ii) gliding within the cellular layer (guid 1628, S1 Table)  
277 (iii) spiraling in the blood meal and within the cellular layer (guid 1622, guid  
278 1624, S2 Table) and (iv) stationary rotation without translocation within the  
279 cellular layer (guid 2115, S1 Table). Some ookinetes were observed within a  
280 midgut cell for more than one hour, suggesting that the parasites may remain  
281 intracellular for relatively long periods of time without inducing cellular  
282 apoptosis. By measuring the parasite speed in the blood meal, cellular layer,  
283 and at the basal lamina, we found that the speed of ookinetes carried by the  
284 bolus content was the highest as compared to other locations (Fig 3b).  
285 Interestingly, the speed of the ookinetes in the blood bolus differed between *As*  
286 (8.2  $\mu\text{m}/\text{min}$ ) and *Ag* (3.4  $\mu\text{m}/\text{min}$ ) midguts, suggesting some differences in the  
287 blood bolus environment. The ookinete spiraling motility in the cellular layer was  
288 much slower in both mosquito species, namely 0.36  $\mu\text{m}/\text{min}$  in *As* and 1.78  
289  $\mu\text{m}/\text{min}$  in *Ag*. The slowest stationary rotation movement of parasites was  
290 observed at the basal lamina (in *As*, average speed 0.28  $\mu\text{m}/\text{min}$ , guid 2113,  
291 S1 Table, in *Ag*, average speed 0.54  $\mu\text{m}/\text{min}$ , guid 1622, S2 Table). We noted  
292 that the speed of ookinetes within the cellular layer and at the basal lamina was  
293 faster in *Ag* mosquitoes than in *As* mosquitoes. This observation indicates  
294 important differences in the cellular organization of midguts of the closely  
295 related mosquito species.

## 296 Ookinete invasion routes

297 To characterize ookinete invasion routes, intra- or extracellular location of the  
 298 ookinetes at the cellular layer was examined in more detail. To this end, we  
 299 developed an algorithm that classified intracellular, extracellular and  
 300 intercellular parasites based on the score of their 3D distance to the four  
 301 nearest neighboring nuclei of the midgut cells. The score was calculated for  
 302 each parasite (Fig 4a,b). The parasites with the score between 0 - 0.45 were  
 303 defined as extracellular, 0.45-0.55 - as intercellular, and higher than 0.55 - as  
 304 intracellular. We noticed a proportion of parasites that was extracellular at all  
 305 time points in both species (Fig 4c).

306

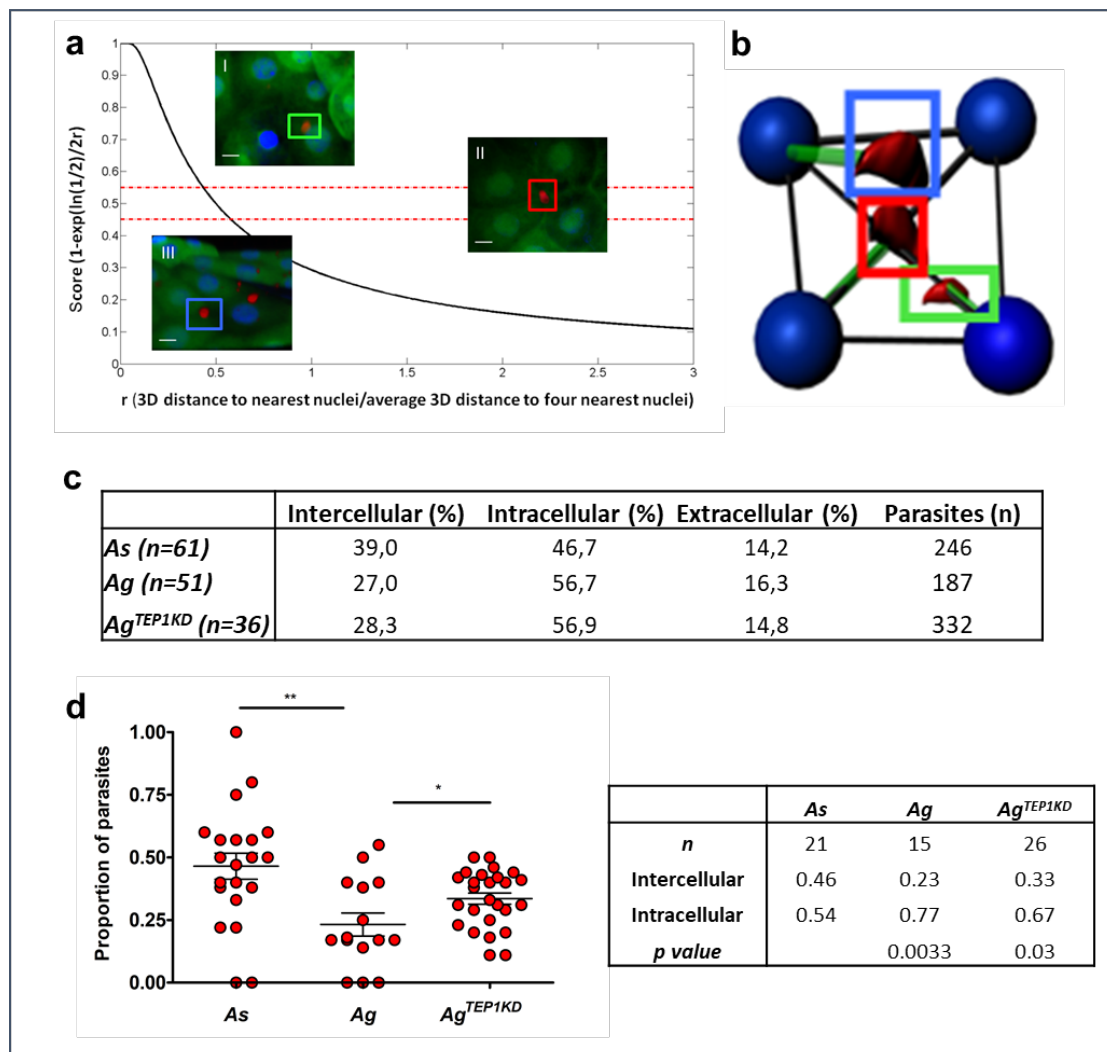

307 **Figure 4. Parasite distribution in the mosquito midgut.** Parasite positions within  
308 the cellular layer calculated relative to the distance of each parasites to the nuclei of  
309 surrounding midgut cells. **a.** Calculations of the distance of parasites from the nuclei  
310 of the nearest neighboring midgut cell. The score ( $s$ ) determines whether the parasite  
311 is intercellular ( $0.45 \leq s \leq 0.55$ ), extracellular ( $s < 0.45$ ), or intracellular ( $s > 0.55$ ).  
312 Example images from a z stack, scale bar = 20  $\mu\text{m}$ : (I)  $s = 0.74$ , the parasite (green  
313 arrow) is intracellular; (II)  $s = 0.45$  (red arrow) the parasite is intercellular and (III)  $s =$   
314  $0.36$ , the parasite is extracellular (blue arrow). **b.** Schematic representation of parasite  
315 (red) and nuclei (blue) positions with distances (green lines) used to calculate  
316 distances from the nuclei. **c.** Positions of parasites within the cell layer over time in *A.*  
317 *stephensi* (*As*), *A. gambiae* (*Ag*) and *A. gambiae* mosquitoes silenced for *TEP1* (*A.*  
318 *gambiae*<sup>*TEP1KD*</sup>). The table indicates the percentage of parasites at each position for  
319 each mosquito. The number ( $n$ ) indicates the number of midguts analyzed for each  
320 mosquito genotype. **d.** Comparison of the proportion of intercellular parasites between  
321 *As*, *Ag* and *Ag*<sup>*TEP1KD*</sup>. Each dot represents the proportion of parasites detected between  
322 cells in a single midgut. Midguts ( $n$ ) with at least six parasites within the cellular layer  
323 were used for analyses. Statistically significant differences between *As* and *Ag* and  
324 between *Ag* and *Ag*<sup>*TEP1KD*</sup> revealed by a non-parametric t-test (Mann-Whitney) are  
325 indicated by asterisks ( $p = 0.03$  (\*);  $p = 0.003$ (\*\*)). The table details the mean  
326 proportion values for parasites in each midgut and for each position for  $n$  mosquitoes.  
327

328 When comparing intercellular and intracellular parasite distribution, a higher  
329 proportion of intercellular ookinetes was observed in *As* (40%) than in *Ag* (20%)  
330 (Fig 4d, S6 Fig). These results point to intricate differences in parasite invasion  
331 routes between the two related *Anopheline* species.

332

### 333 **Parasite viability within the midgut**

334 As the transgenic *P. berghei* line used in this study expressed the fluorescence  
335 reporter under a constitutive promoter, we were surprised by high variability in  
336 the reporter fluorescence levels observed between individual parasites in the  
337 same midgut. We examined whether differences in fluorescence intensity  
338 correlated with parasite localization and time post infection in two mosquito  
339 species. To compare different experimental conditions, we normalized  
340 fluorescence intensity of each parasite based on the highest and lowest  
341 intensity of parasites in each image. We found only modest overall differences  
342 in mean fluorescence intensities at different positions (basal lamina, cellular

343 layer, blood meal) over time and between the two species (S7-S9 Fig, Tables  
 344 S8-S9). Furthermore, we observed the parasites with very low levels of  
 345 fluorescence that appeared as a black hole on the background of the midgut  
 346 cells expressing GFP reporter in *Ag* mosquitoes (Fig 5a) that expressed GFP  
 347 uniformly in all midgut cells. In contrast, irregular patterns of GFP expression in  
 348 the midgut were reported for *As* [18] (S1 Fig). Hence, fluorescence-negative  
 349 parasites were only examined in *Ag* where parasites were clearly identified as  
 350 black shapes on fluorescent background.

351

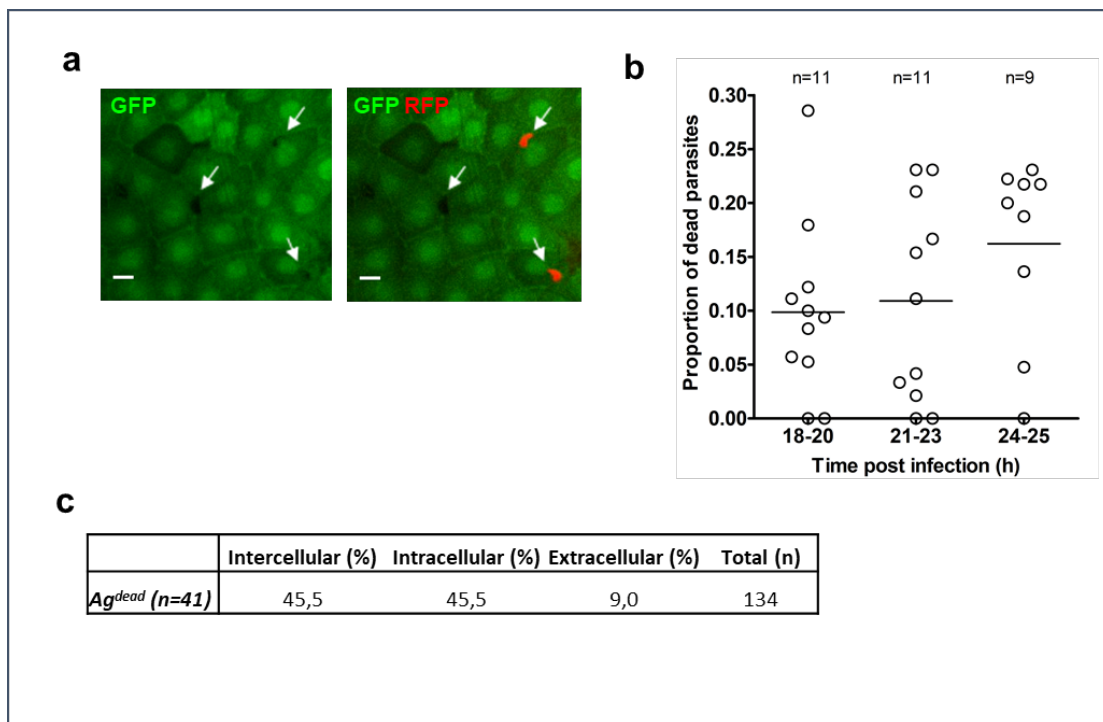

352  
 353  
 354  
 355  
 356  
 357  
 358  
 359  
 360  
 361  
 362  
 363  
 364  
 365

**Figure 5. Quantification of dead parasites in *A. gambiae*.** **a.** Detection of dead parasites within the cellular layer. Due to uniform GFP expression with the midgut cells of the *dmAct5C::GFP* line of *A. gambiae*, dead parasites that no longer express RFP could be distinguished in the midgut by their negative signal and a characteristic shape. Shown is a single z-section (scale bar - 20  $\mu$ m) containing two live RFP-expressing parasites and one dead parasite, indicated by arrows. **b.** The proportion of dead parasites at different time points after *Ag* infection. Midguts (n) that contained at least 10 parasites were used for analyses. Each dot represents a single midgut. **c.** Distribution of dead parasites within the cellular layer. The table gives the number of parasites at each position at all time points. The number (n) is the number of midguts analyzed. Total (n) is the number of all analyzed parasites.



366 We considered the parasites that lost their fluorescence dying or dead [11,25].  
367 On average, 10-15% of all recognized parasites had no fluorescence and were  
368 classified as dead (Fig 5b). Differences in distribution were observed for live  
369 and dead parasites within the cellular layer. More dead parasites were found to  
370 be located extracellular or intercellular (compare Fig 5c and Fig 4d). This  
371 observation points to more efficient parasite killing of extracellular parasites.  
372 Interestingly, we hardly detected any dead parasites in *Ag*<sup>TEP1KD</sup> mosquitoes,  
373 suggesting that TEP1 may be involved in killing of parasites within the cellular  
374 layer.

375

#### 376 **Cell damage caused by parasite passage**

377 Midgut regeneration is a natural process of epithelia renovation after a blood  
378 feeding, whether infective or not [26]. Blood meal generates a stressful  
379 environment as it contains bacteria, reactive oxygen species and digestive  
380 enzymes that may cause damage to the midgut cells. It has been previously  
381 suggested that invaded midgut cells die after invasion and are expelled into the  
382 midgut lumen [27] resulting in accumulation of hundreds of cells in highly  
383 infected midguts. However, we only once observed GFP positive midgut cells  
384 in the midgut lumen. This result indicates that either upon expel dead midgut  
385 cells rapidly lose their GFP fluorescence, or that only few midgut cells are  
386 expelled after invasion. To resolve these conjectures, we investigated the  
387 integrity of the cell layer using high molecular weight Texas-Red conjugated  
388 dextran which is trapped inside damaged cells [28]. In these experiments, the  
389 fluorescent dextran was delivered into the midgut by blood feeding mosquitoes  
390 on mice injected intravenously with fluorescent dextran several minutes before

391 mosquito feeding. We detected dextran filled cells (Fig 6a), calculated their  
392 position (Fig 6b, S11 Fig) and measured the distance to the nearest parasite  
393 (Fig 6c). The majority of dextran filled cells (70%) that contained a parasite in  
394 *As* were predominantly detected in the cellular layer. In contrast in *Ag*, dextran  
395 filled cells were observed both in the cellular layer and in the midgut lumen (Fig  
396 6b). As many as 30% of dextran filled cells in *Ag*, were found in the midgut  
397 lumen. Out of these, 50% contained a parasite (S10 Table). In contrast, we  
398 found only one (5% of total) dextran filled cell the midgut lumen of *As*  
399 mosquitoes.  
400

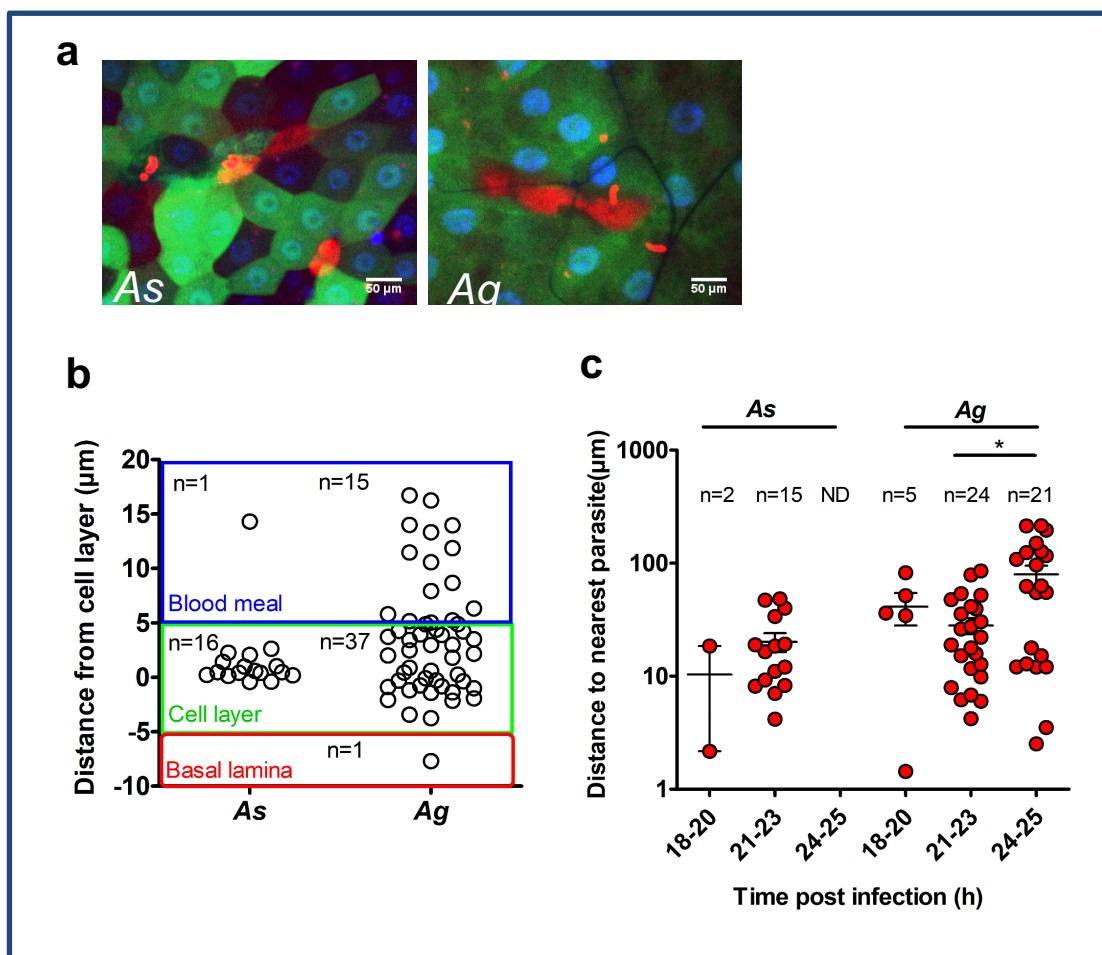

401  
402  
403  
404  
405

**Figure 6. Quantification of damaged cells.** a. Detection of dextran-positive cells in the midguts of *As* and *Ag* mosquitoes. Shown are single z-sections of GFP-expressing dissected midguts. Mosquitoes were fed on mice injected with Texas-Red conjugated

406 dextran. Dextran-filled cells appeared red (scale bar - 50  $\mu$ m). **b.** Positions of dextran-  
407 filled cells in the midgut layers of *As* and *Ag*. Each dot represents a single dextran-  
408 positive cell. The graph depicts positions of the dextran-positive cells within the midgut  
409 layers. Each midgut layer is color coded: Blood meal (blue), cellular layer (green) and  
410 basal lamina (red). The number of dextran filled cells (n) at each position is indicated.  
411 **c.** Distances of dextran-filled cells to the nearest parasite at different time points after  
412 infection of *Ag* and *As*. The number of dextran filled cells analyzed (n) is shown.  
413 Statistical analysis was performed by a Mann-Whitney non-parametric t-test.

414  
415 Interestingly in *Ag*, the distance between the dextran-positive cell and the  
416 nearest parasite significantly increased at 24-25 hpi compared to the earlier  
417 time intervals (Fig 6c). Furthermore, no dextran-positive cells were found in *As*  
418 at the late time interval after infection (24-25 hpi). Taken together, these results  
419 suggest that in *Ag* mosquitoes, damaged cells are readily extruded into the  
420 midgut lumen with or without the parasites. It is important to note that while  
421 some dextran filled cells contained a parasite, most midgut cells that we  
422 observed to host a parasite were dextran-negative, indicating that ookinete  
423 invasion damaged and killed only a small proportion of midgut cells.  
424 Interestingly, in both *As* and *Ag*, we never observed more than one parasite in  
425 a non-damaged midgut cell, indicating that parasites refrain from entering an  
426 invaded cell. Here we also observed chains of several connected dextran-  
427 positive cells, indicating that ookinetes can traverse several neighboring cells  
428 before exiting on the basal side of the cellular layer. In conclusion, our results  
429 led us to suggest that the route of ookinete invasion for the same parasite is  
430 species-specific and shaped by midgut tissue morphology, physiology, damage  
431 and immune responses. Future studies should examine how invasion  
432 strategies of the human malaria *P. falciparum* parasites are affected by diverse  
433 vector species.

## 434 Conclusions

435 By combining live imaging techniques with quantitative bioimage analysis  
436 workflow, we uncovered differences in ookinete invasion strategies in two  
437 related mosquito species. We showed that in both species, the “pioneer”  
438 parasites that first reach the basal side of the midgut were rapidly eliminated by  
439 the mosquito immune system, and that colonization of the mosquito midgut was  
440 initiated at later stages of the infection. High throughput image data analyses  
441 of two *Anopheles* species revealed important differences in parasite invasion  
442 routes. We showed that the average ookinete speed in the cellular layer is lower  
443 in *As* compared to *Ag* mosquitoes. Moreover, *As* midguts contained more  
444 intercellular parasites and displayed higher numbers of damaged parasite-  
445 harboring cells. These results indicate that faster ookinete speeds and  
446 preference for intracellular route may impede parasite survival during invasion  
447 in *Ag*, the mosquito species which is more resistant to *P. berghei* infection.

448 The reported here combination of live imaging and automated image analysis  
449 is highly adaptable and can be extended to functional analyses of gene  
450 knockdowns, mutations, and drug treatments. Moreover, the image data base  
451 and image analysis tools generated by this study offer a powerful tool for  
452 studying *Plasmodium* motility in *Anopheles* mosquitoes.

## 453 Materials and methods

### 454 Mosquito rearing

455 Transgenic *Anopheles stephensi* mosquitoes expressing GFP under the  
456 midgut-specific G12 promoter (*pG12::EGFP transgenic line* [18]) and  
457 *Anopheles gambiae* expressing GFP under the *Drosophila Acti5c* promoter

458 (*dmActin5c::dsx-eGFP*) line [19]) were reared in the lab as previously described  
459 [29]. Briefly, mosquitoes were maintained in standard conditions (28°C, 75–  
460 80% humidity, 12-hr/12-hr light/dark cycle). Larvae were raised in deionized  
461 water and fed finely ground TetraMin fish food. Adults were fed on 10% sucrose  
462 *ad libitum* and females were blood fed on anaesthetized mice. To obtain *Ag*  
463 mosquitoes that do not express *TEP1*, the dominant *TEP1* knockdown *Ag*<sup>TEP1KD</sup>  
464 transgenic line [30] was crossed to *dmActin5c::dsx-eGFP* mosquitoes. The F1  
465 progeny had reduced *TEP1* levels while expressing GFP in the midgut [30].

#### 466 ***P. berghei* infections**

467 For infections, mosquitoes were blood fed on *P. berghei* infected mice as  
468 previously described [31]. *P. berghei* pyrimethamine resistant strain (RMgm  
469 296) constitutively expressed RFP [20]. For the visualization of damaged  
470 mosquito cells, mice were injected in the tail vein with 0.1 ml of 5% dextran  
471 (3,000 kDa Texas Red conjugated, Invitrogen) diluted in PBS 10 min prior to  
472 blood feeding. Mosquitoes were blood fed for 20 min on anesthetized mice and  
473 dissected between 18-24 h after blood feeding, as indicated in each  
474 experiment.

#### 475 **Confocal microscopy**

476 Immediately prior to visualization, infected mosquitoes were dissected on ice in  
477 PBS buffer supplemented with 0.02% DAPI (Thermo Fisher, 4',6-diamidino-2-  
478 phenylindole, 5 mg/mL), and with 0.2% tricaine (Sigma), 0.02% tetramisole  
479 (Sigma) to prevent midgut contraction during image acquisition. Blood-filled  
480 midguts were placed on 35 mm plastic dishes with glass bottom (Nunc,  
481 ThermoFisher). Dishes were mounted on inverted DMI6000 Leica Microscope,  
482 equipped with a Nipkow Disk confocal module (Andor Revolution), 20X

483 objective. For time-lapse experiments, samples were visualized for up to two  
484 hours at 1 min intervals. The number of 1  $\mu$ m-stacks, annotated for each image,  
485 ranged between 24 and 95 depending on tissue thickness. We noticed that *As*  
486 midguts were rigid and sturdy, allowing for longer live imaging. *Ag* midguts were  
487 more fragile and tended to move and tear during image acquisition. We were  
488 able to collect live imaging data from 16 *As* (S1 Table) and 5 *Ag* midguts (S2  
489 Table). We were not able to follow parasites in mosquitoes lacking the immune  
490 protein TEP1 due to high midgut fragility of *Ag*<sup>TEP1KD</sup> midguts.

#### 491 **Image analyses**

492 All images were uploaded to a database where they were annotated according  
493 to mosquito species and other experimental conditions. Images were subjected  
494 to bulk analysis as well as manual verification. The annotated image database  
495 is accessible to JAVA programming using the Strand Avadis IManage data  
496 management software. All data (images and extracted data as text files) are  
497 available on cid.curie.fr, Project "Malaria parasite invasion in the mosquito  
498 tissues" at <https://cid.curie.fr/iManage/standard/login.html>. The META data is  
499 managed using OpenImadis <https://strandls.github.io/openimadis/>. Companion  
500 scripts are available here:

501 <https://github.com/PerrineGilloteaux/MalariaParasiteinMosquito>.

502 The api documentation is available under API tab  
503 <https://cid.curie.fr/iManage/api/client/>. The api client jar is available at  
504 <https://cid.curie.fr/iManage/standard/downloads.html>.

505 Companion scripts include segmentation of parasites, nuclei and quantification  
506 of intensities corrected by background was performed using a set of ImageJ

507 Plugins in Java. Analysis of the position of parasites relative to cell layer and  
508 statistics are performed with MATLAB.

509 The data set was collected from 110 experiments including a total of 2,557  
510 parasites (*As* - 45 midguts, 1,068 parasites; *Ag* - 34 midguts, 796 parasites;  
511 and *Ag<sup>Tep1KD</sup>* – 31 midguts, 693 parasites). There was no bias in the number of  
512 parasites per midgut across different time points and mosquito species (S2  
513 Fig). Furthermore, we found that infection levels (low, intermediate, or high) had  
514 some effect on the result of parasite distribution, specifically in at low infection  
515 levels (S3 Fig). Consequently, we used for our analysis only images that  
516 contained at least 10 parasites per image.

#### 517 **Ethics statement**

518 The animal work described in this study received agreement #E67-482-2 from  
519 the veterinary services of the region Bas-Rhin, France (Direction  
520 départementale des services vétérinaires).

#### 521 **Acknowledgments**

522 GV, JŠ, JS and EAL thank M.E. Moritz and C. Kappler for help with the  
523 mosquito colony and parasite cultures; and E. Marois for scientific discussions  
524 and support. JeS and PPG acknowledge the Structure fédérative de recherche  
525 santé François-Bonamy and the SERPICO team, are members of the national  
526 infrastructure "France Biolmaging". Authors thank A. Volohonsky for graphic  
527 expertise.

#### 528 **Author contributions**



529 Conceived and designed the experiments: GV, EAL. Performed the  
530 experiments: GV, JŠ, JuS. Analyzed the data: GV, PPG, JeS, EAL. Contributed  
531 reagents/materials/analysis tools: PPG, JeS. Wrote the paper: GV, EAL.

## 532 References

- 533 1. WHO. WHO | World malaria report 2017. WHO. World Health  
534 Organization; 2018.
- 535 2. Kiszewski A, Mellinger A, Spielman A, Malaney P, Sachs SE, Sachs J. A  
536 global index representing the stability of malaria transmission. *Am J Trop*  
537 *Med Hyg.* 2004; 70(5): 486–498.
- 538 3. Baton L, Ranford-Cartwright L. How do malaria ookinetes cross the  
539 mosquito midgut wall? *Trends Parasitol.* 2005; 21(1): 22–28.
- 540 4. Sinden RE. Molecular interactions between *Plasmodium* and its insect  
541 vectors. *Cell Microbiol.* 2002; 4(11): 713–724.
- 542 5. Blandin S, Levashina EA. Mosquito immune responses against malaria  
543 parasites. *Curr Opin Immunol.* 2004; 16(1): 16–20.
- 544 6. Blandin SA, Marois E, Levashina EA. Antimalarial responses in  
545 *Anopheles gambiae*: from a complement-like protein to a complement-  
546 like pathway. *Cell Host Microbe.* 2008; 3(6): 364–374.
- 547 7. Blandin SA, Levashina EA. Phagocytosis in mosquito immune  
548 responses. *Immunol Rev.* 2007; 219(1): 8–16.
- 549 8. Smith RC, Vega-Rodríguez J, Jacobs-Lorena M. The *Plasmodium*  
550 bottleneck: malaria parasite losses in the mosquito vector. *Mem Inst*  
551 *Oswaldo Cruz.* 2014; 109(5): 644–661.
- 552 9. Oliveira G de A, Lieberman J, Barillas-Mury C. Epithelial nitration by a  
553 peroxidase/NOX5 system mediates mosquito antiplasmodial immunity.

- 554 Science. 2012; 335(6070): 856–859.
- 555 10. Kumar S, Gupta L, Han YS, Barillas-Mury C. Inducible peroxidases  
556 mediate nitration of anopheles midgut cells undergoing apoptosis in  
557 response to *Plasmodium* invasion. J Biol Chem. 2004; 279(51): 53475–  
558 53482.
- 559 11. Fraiture M, Baxter RHG, Steinert S, Chelliah Y, Frolet C, Quispe-Tintaya  
560 W, et al. Two mosquito LRR proteins function as complement control  
561 factors in the TEP1-mediated killing of *Plasmodium*. Cell Host Microbe.  
562 2009; 5(3): 273–284.
- 563 12. Povelones M, Waterhouse RM, Kafatos FC, Christophides GK. Leucine-  
564 rich repeat protein complex activates mosquito complement in defense  
565 against *Plasmodium* parasites. Science. 2009; 324(5924): 258–261.
- 566 13. Meis JFGM, Pool G, van Gemert GJ, Lensen AHW, Ponnudurai T,  
567 Meuwissen JHET. *Plasmodium falciparum* ookinetes migrate  
568 intercellularly through *Anopheles stephensi* midgut epithelium. Parasitol  
569 Res. 1989; 76(1): 13–19.
- 570 14. Vlachou D, Zimmermann T, Cantera R, Janse CJ, Waters AP, Kafatos  
571 FC. Real-time, in vivo analysis of malaria ookinete locomotion and  
572 mosquito midgut invasion. Cell Microbiol. 2004; 6(7): 671–685.
- 573 15. Kan A, Tan Y-H, Angrisano F, Hanssen E, Rogers KL, Whitehead L, et  
574 al. Quantitative analysis of *Plasmodium* ookinete motion in three  
575 dimensions suggests a critical role for cell shape in the biomechanics of  
576 malaria parasite gliding motility. Cell Microbiol. 2014; 16(5): 734–750.
- 577 16. Beier JC. Malaria parasite development in mosquitoes. Annu Rev  
578 Entomol. 1998; 43(1): 519–543.

- 579 17. Alavi Y, Arai M, Mendoza J, Tufet-Bayona M, Sinha R, Fowler K, et al.  
580 The dynamics of interactions between *Plasmodium* and the mosquito: a  
581 study of the infectivity of *Plasmodium berghei* and *Plasmodium*  
582 *gallinaceum*, and their transmission by *Anopheles stephensi*, *Anopheles*  
583 *gambiae* and *Aedes aegypti*. Int J Parasitol. 2003; 33(9): 933–943.
- 584 18. Nolan T, Petris E, Müller H-M, Cronin A, Catteruccia F, Crisanti A.  
585 Analysis of two novel midgut-specific promoters driving transgene  
586 expression in *Anopheles stephensi* mosquitoes. PLoS One. 2011; 6(2):  
587 e16471.
- 588 19. Magnusson K, Mendes AM, Windbichler N, Papathanos P-A, Nolan T,  
589 Dottorini T, et al. Transcription regulation of sex-biased genes during  
590 ontogeny in the malaria vector *Anopheles gambiae*. PLoS One. 2011;  
591 6(6): e21572.
- 592 20. Graewe S, Retzlaff S, Struck N, Janse CJ, Heussler VT. Going live: A  
593 comparative analysis of the suitability of the RFP derivatives RedStar,  
594 mCherry and tdTomato for intravital and *in vitro* live imaging of  
595 *Plasmodium* parasites. Biotechnol J. 2009; 4(6): 895–902.
- 596 21. Neira Oviedo M, Vanekeris L, Corena-McLeod MDP, Linser PJ. A  
597 microarray-based analysis of transcriptional compartmentalization in the  
598 alimentary canal of *Anopheles gambiae* (Diptera: Culicidae) larvae.  
599 Insect Mol Biol. 2008; 17(1): 61–72.
- 600 22. MacCallum RM, Redmond SN, Christophides GK. An expression map for  
601 *Anopheles gambiae*. BMC Genomics. 2011; 12(1): 620.
- 602 23. Dong Y, Manfredini F, Dimopoulos G. Implication of the mosquito midgut  
603 microbiota in the defense against malaria parasites. PLoS Pathog. 2009;

- 604 5(5): e1000423.
- 605 24. Blandin S, Shiao S-H, Moita LF, Janse CJ, Waters AP, Kafatos FC, et al.  
606 Complement-like protein TEP1 is a determinant of vectorial capacity in  
607 the malaria vector *Anopheles gambiae*. *Cell*. 2004; 116(5): 661–670.
- 608 25. Frolet C, Thoma M, Blandin S, Hoffmann JA, Levashina EA. Boosting  
609 NF-kappaB-dependent basal immunity of *Anopheles gambiae* aborts  
610 development of *Plasmodium berghei*. *Immunity*. 2006; 25(4): 677–685.
- 611 26. Okuda K, de Almeida F, Mortara RA, Krieger H, Marinotti O, Tania  
612 Bijovsky A. Cell death and regeneration in the midgut of the mosquito,  
613 *Culex quinquefasciatus*. *J Insect Physiol*. 2007; 53(12): 1307–1315.
- 614 27. Han YS, Thompson J, Kafatos FC, Barillas-Mury C. Molecular  
615 interactions between *Anopheles stephensi* midgut cells and *Plasmodium*  
616 *berghei*: the time bomb theory of ookinete invasion of mosquitoes. *EMBO*  
617 *J*. 2000; 19(22): 6030–6040.
- 618 28. Liang H, Purucker WJ, Stenger DA, Kubinieć RT, Hui SW. Uptake of  
619 fluorescence-labeled dextrans by 10T 1/2 fibroblasts following  
620 permeation by rectangular and exponential-decay electric field pulses.  
621 *Biotechniques*. 1988; 6(6): 550–552, 554, 556–558.
- 622 29. Volohonsky G, Terenzi O, Soichot J, Naujoks DA, Nolan T, Windbichler  
623 N, et al. Tools for *Anopheles gambiae* Transgenesis. *G3*. 2015; 5(6):  
624 1151–1163.
- 625 30. Pompon J, Levashina EA. A New Role of the Mosquito Complement-like  
626 Cascade in Male Fertility in *Anopheles gambiae*. *PLoS Biol*. 2015; 13(9):  
627 e1002255.
- 628 31. Volohonsky G, Hopp A-K, Saenger M, Soichot J, Scholze H, Boch J, et

- 629 al. Transgenic Expression of the Anti-parasitic Factor TEP1 in the Malaria  
630 Mosquito *Anopheles gambiae*. PLoS Pathog. 2017; 13(1): e1006113.
